# Supplementary material for: Exploring Fold Space Preferences of New-born and Ancient Protein Superfamilies
Source: PLOS journal article supplement (doi:10.1371/journal.pcbi.1003325), 2013-11-14
Supplement: S6 (10.1371/journal.pcbi.1003325.s006) [file journal.pcbi.1003325.s006]

**Table S1. Enriched functional terms for different age groups.**

| <b>GO term</b>                                         | <b>Age group</b> | <b>p-value</b> |
|--------------------------------------------------------|------------------|----------------|
| anatomical structure morphogenesis                     | middle_aged      | 0.00727        |
| positive regulation of cellular process                | middle_aged      | 0.00346        |
| protein binding                                        | middle_aged      | 0.00631        |
| regulation of cellular process                         | middle_aged      | 0.0095         |
| regulation of developmental process                    | middle_aged      | 0.00103        |
| tissue development                                     | middle_aged      | 0.00645        |
| acetyl-CoA metabolic process                           | ancient          | 8.35e-05       |
| adenyl nucleotide binding                              | ancient          | 0.00169        |
| adenyl ribonucleotide binding                          | ancient          | 0.00169        |
| amine biosynthetic process                             | ancient          | 3.26e-09       |
| amine catabolic process                                | ancient          | 0.00225        |
| amine metabolic process                                | ancient          | 5.41e-21       |
| aspartate family amino acid metabolic process          | ancient          | 0.00193        |
| ATP metabolic process                                  | ancient          | 0.00744        |
| <i>biosynthetic process</i>                            | ancient          | 2.36e-34       |
| carbohydrate biosynthetic process                      | ancient          | 1.45e-08       |
| carbohydrate catabolic process                         | ancient          | 0.00017        |
| carbohydrate derivative catabolic process              | ancient          | 0.000489       |
| carbohydrate derivative metabolic process              | ancient          | 8.94e-09       |
| carbohydrate metabolic process                         | ancient          | 1.4e-05        |
| carbon-carbon lyase activity                           | ancient          | 3.54e-06       |
| carbon-oxygen lyase activity                           | ancient          | 0.00221        |
| carboxylic acid biosynthetic process                   | ancient          | 4.16e-08       |
| carboxylic acid metabolic process                      | ancient          | 1.03e-21       |
| carboxy-lyase activity                                 | ancient          | 0.00424        |
| catabolic process                                      | ancient          | 2.38e-13       |
| <i>catalytic activity</i>                              | ancient          | 7.25e-35       |
| cellular amine metabolic process                       | ancient          | 3.17e-23       |
| cellular amino acid biosynthetic process               | ancient          | 1.26e-09       |
| cellular amino acid metabolic process                  | ancient          | 1.16e-20       |
| cellular aromatic compound metabolic process           | ancient          | 1.97e-10       |
| <i>cellular biosynthetic process</i>                   | ancient          | 1.27e-30       |
| cellular carbohydrate biosynthetic process             | ancient          | 0.00193        |
| cellular catabolic process                             | ancient          | 4.69e-09       |
| cellular component biogenesis at cellular level        | ancient          | 0.000489       |
| cellular ketone metabolic process                      | ancient          | 2.96e-23       |
| cellular macromolecule biosynthetic process            | ancient          | 8.81e-09       |
| cellular macromolecule metabolic process               | ancient          | 5.46e-06       |
| <i>cellular metabolic process</i>                      | ancient          | 7.08e-39       |
| <i>cellular nitrogen compound biosynthetic process</i> | ancient          | 5.57e-21       |
| cellular nitrogen compound catabolic process           | ancient          | 3.01e-05       |
| <i>cellular nitrogen compound metabolic process</i>    | ancient          | 1.43e-28       |
| cellular polysaccharide biosynthetic process           | ancient          | 0.00424        |
| cellular polysaccharide metabolic process              | ancient          | 0.000883       |
| cellular process                                       | ancient          | 1.56e-14       |

Continued on next page

**Table S1 – continued from previous page**

| <b>GO term</b>                                                                     | <b>Age group</b> | <b>p-value</b> |
|------------------------------------------------------------------------------------|------------------|----------------|
| cellular respiration                                                               | ancient          | 0.0081         |
| coenzyme biosynthetic process                                                      | ancient          | 2.77e-08       |
| <i>coenzyme metabolic process</i>                                                  | ancient          | 7.84e-20       |
| cofactor biosynthetic process                                                      | ancient          | 3.26e-08       |
| cofactor catabolic process                                                         | ancient          | 0.00193        |
| cofactor metabolic process                                                         | ancient          | 1.9e-17        |
| cytoplasm                                                                          | ancient          | 8.9e-09        |
| cytoplasmic part                                                                   | ancient          | 1.52e-10       |
| cytosol                                                                            | ancient          | 0.000178       |
| cytosolic part                                                                     | ancient          | 1.63e-06       |
| dicarboxylic acid metabolic process                                                | ancient          | 0.000403       |
| energy derivation by oxidation of organic compounds                                | ancient          | 6.56e-06       |
| gene expression                                                                    | ancient          | 2.2e-08        |
| generation of precursor metabolites and energy                                     | ancient          | 6.03e-10       |
| glucose catabolic process                                                          | ancient          | 0.000183       |
| glucose metabolic process                                                          | ancient          | 3.8e-05        |
| glutamine family amino acid metabolic process                                      | ancient          | 0.000382       |
| heterocycle biosynthetic process                                                   | ancient          | 9.02e-15       |
| heterocycle catabolic process                                                      | ancient          | 6.34e-05       |
| <i>heterocycle metabolic process</i>                                               | ancient          | 5.49e-28       |
| hexose catabolic process                                                           | ancient          | 1.72e-05       |
| hexose metabolic process                                                           | ancient          | 2.9e-07        |
| hydrolase activity                                                                 | ancient          | 8.29e-07       |
| hydrolase activity, acting on acid anhydrides                                      | ancient          | 0.000662       |
| hydrolase activity, acting on acid anhydrides, in phosphorus-containing anhydrides | ancient          | 0.000662       |
| hydrolase activity, acting on carbon-nitrogen (but not peptide) bonds              | ancient          | 0.0081         |
| intracellular                                                                      | ancient          | 0.00112        |
| intracellular part                                                                 | ancient          | 0.00112        |
| isomerase activity                                                                 | ancient          | 0.00308        |
| large ribosomal subunit                                                            | ancient          | 0.00108        |
| lyase activity                                                                     | ancient          | 7.91e-10       |
| macromolecule biosynthetic process                                                 | ancient          | 9.97e-09       |
| macromolecule metabolic process                                                    | ancient          | 0.00217        |
| <i>metabolic process</i>                                                           | ancient          | 2.95e-35       |
| microbody                                                                          | ancient          | 0.00928        |
| mitochondrial matrix                                                               | ancient          | 1.02e-07       |
| mitochondrial part                                                                 | ancient          | 2.73e-08       |
| mitochondrion                                                                      | ancient          | 1.23e-14       |
| <i>molecular function</i>                                                          | ancient          | 7.68e-08       |
| monocarboxylic acid metabolic process                                              | ancient          | 0.00421        |
| monosaccharide catabolic process                                                   | ancient          | 3.54e-06       |
| monosaccharide metabolic process                                                   | ancient          | 2.11e-07       |
| ncRNA metabolic process                                                            | ancient          | 8.14e-07       |
| ncRNA processing                                                                   | ancient          | 8.43e-05       |
| nicotinamide nucleotide metabolic process                                          | ancient          | 0.00926        |
| Continued on next page                                                             |                  |                |

**Table S1 – continued from previous page**

| <b>GO term</b>                                                                        | <b>Age group</b> | <b>p-value</b> |
|---------------------------------------------------------------------------------------|------------------|----------------|
| <i>nitrogen compound metabolic process</i>                                            | ancient          | 1.37e-26       |
| nucleobase-containing compound biosynthetic process                                   | ancient          | 1.32e-08       |
| nucleobase-containing compound catabolic process                                      | ancient          | 7.16e-05       |
| nucleobase-containing compound metabolic process                                      | ancient          | 1.56e-13       |
| nucleobase-containing small molecule metabolic process                                | ancient          | 3.05e-23       |
| nucleoside metabolic process                                                          | ancient          | 0.000124       |
| nucleoside phosphate metabolic process                                                | ancient          | 1.56e-20       |
| nucleoside triphosphate catabolic process                                             | ancient          | 0.00216        |
| nucleoside triphosphate metabolic process                                             | ancient          | 2.37e-05       |
| nucleotide binding                                                                    | ancient          | 3.1e-06        |
| nucleotide biosynthetic process                                                       | ancient          | 4.32e-05       |
| nucleotide catabolic process                                                          | ancient          | 0.000317       |
| nucleotide metabolic process                                                          | ancient          | 3.32e-20       |
| organic acid biosynthetic process                                                     | ancient          | 4.16e-08       |
| organic acid catabolic process                                                        | ancient          | 0.00639        |
| organic acid metabolic process                                                        | ancient          | 1.23e-22       |
| organic substance metabolic process                                                   | ancient          | 3.19e-08       |
| oxidation-reduction process                                                           | ancient          | 1.16e-08       |
| oxidoreductase activity                                                               | ancient          | 1.46e-06       |
| oxidoreductase activity, acting on CH-OH group of donors                              | ancient          | 0.000128       |
| oxidoreductase activity, acting on the CH-OH group of donors, NAD or NADP as acceptor | ancient          | 0.00193        |
| oxidoreduction coenzyme metabolic process                                             | ancient          | 0.000403       |
| oxoacid metabolic process                                                             | ancient          | 2.51e-22       |
| plastid                                                                               | ancient          | 0.000132       |
| polysaccharide biosynthetic process                                                   | ancient          | 8.35e-05       |
| <i>primary metabolic process</i>                                                      | ancient          | 3.35e-24       |
| purine-containing compound biosynthetic process                                       | ancient          | 6.18e-05       |
| purine-containing compound metabolic process                                          | ancient          | 6.56e-13       |
| purine nucleoside metabolic process                                                   | ancient          | 0.00313        |
| purine nucleoside triphosphate catabolic process                                      | ancient          | 0.00803        |
| purine nucleoside triphosphate metabolic process                                      | ancient          | 0.000325       |
| purine nucleotide binding                                                             | ancient          | 0.000327       |
| purine nucleotide biosynthetic process                                                | ancient          | 0.0038         |
| purine nucleotide catabolic process                                                   | ancient          | 0.00111        |
| purine nucleotide metabolic process                                                   | ancient          | 1.6e-11        |
| purine ribonucleoside metabolic process                                               | ancient          | 0.00313        |
| purine ribonucleoside triphosphate metabolic process                                  | ancient          | 0.000619       |
| purine ribonucleotide binding                                                         | ancient          | 0.000327       |
| purine ribonucleotide catabolic process                                               | ancient          | 0.00417        |
| purine ribonucleotide metabolic process                                               | ancient          | 3.26e-09       |
| pyridine-containing compound metabolic process                                        | ancient          | 0.00424        |
| pyridine nucleotide metabolic process                                                 | ancient          | 0.00424        |
| pyrophosphatase activity                                                              | ancient          | 0.00111        |
| ribonucleoprotein complex                                                             | ancient          | 0.00565        |
| ribonucleoside metabolic process                                                      | ancient          | 0.000382       |
| Continued on next page                                                                |                  |                |

**Table S1 – continued from previous page**

| <b>GO term</b>                                | <b>Age group</b> | <b>p-value</b> |
|-----------------------------------------------|------------------|----------------|
| ribonucleoside triphosphate metabolic process | ancient          | 0.000325       |
| ribonucleotide binding                        | ancient          | 0.000327       |
| ribonucleotide catabolic process              | ancient          | 0.00417        |
| ribonucleotide metabolic process              | ancient          | 4.23e-09       |
| ribosomal subunit                             | ancient          | 1.57e-09       |
| ribosome                                      | ancient          | 5.52e-09       |
| RNA binding                                   | ancient          | 0.00321        |
| small molecule binding                        | ancient          | 2.74e-05       |
| small molecule biosynthetic process           | ancient          | 1.15e-09       |
| small molecule catabolic process              | ancient          | 0.0019         |
| <i>small molecule metabolic process</i>       | ancient          | 3.4e-34        |
| structural constituent of ribosome            | ancient          | 3.01e-08       |
| sulfur compound biosynthetic process          | ancient          | 0.00221        |
| sulfur compound metabolic process             | ancient          | 4.51e-05       |
| transferase activity                          | ancient          | 2.35e-07       |
| translation                                   | ancient          | 8.11e-10       |
| tRNA metabolic process                        | ancient          | 3.19e-07       |
